# Supplementary material for: The secondary coordination sphere controlled reactivity of a ferric-superoxo heme: unexpected conversion to a ferric hydroperoxo intermediate by reaction with a high-spin ferrous heme
Source: Royal Society of Chemistry journal article supplement (doi:10.1039/c6cc02162j), 2016-01-01
Supplement: c6cc02162j1.pdf [file c6cc02162j1.pdf]

## Supporting information

### **The secondary coordination sphere controlled reactivity of a ferric-superoxo heme: Unexpected conversion to a ferric hydroperoxo intermediate by a reaction with a high-spin ferrous heme**

Perumandla Nagaraju,<sup>a,c</sup> Takehiro Ohta,<sup>b,c,\*</sup> Jin-Gang Liu,<sup>d</sup> Takashi Ogura<sup>b</sup> and  
Yoshinori Naruta<sup>a,c,\*</sup>

<sup>a</sup>*Institute of Science and Technology Research, Chubu University, Kasugai, Aichi 487-8501, Japan. Email: naruta@isc.chubu.ac.jp*

<sup>b</sup>*Picobiology Institute, Graduate School of Life Science, University of Hyogo, Hyogo 679-5148, Japan.*

*Email: takehiro@sci.u-hyogo.ac.jp*

<sup>c</sup>*Institute for Materials Chemistry and Engineering, Kyushu University, Fukuoka 812-8581, Japan.*

<sup>d</sup>*Department of Chemistry, East China University of Science and Technology, 20237 Shanghai, China.*

## General

All reagents and solvents were obtained commercially and used without further purification unless otherwise noted. Tetrahydrofuran (THF) was pre-dried over KOH and distilled from Na/benzophenone under N<sub>2</sub> atmosphere. Acetonitrile (CH<sub>3</sub>CN) for spectroscopic measurements was purified as follows: It was first distilled from P<sub>2</sub>O<sub>5</sub> and redistilled from CaH<sub>2</sub>. After being degassed three times by freeze-thaw method, it was stirred over KO<sub>2</sub> (Aldrich) for ca. 1 h and then passed through activated alumina (Wako) which was dried in prior at 120 °C under vacuum for 10 h. Subsequently, it was degassed three times by freeze-thaw technique again. The other degassed solvents were also treated by freeze-thaw method. Preparation and handling of air sensitive materials were carried out under N<sub>2</sub> in a glove-box (M. Braun 150B-G-II) equipped with a circulating purifier (O<sub>2</sub>, H<sub>2</sub>O < 1 ppm). Cobaltocene (CoCp<sub>2</sub>) was freshly sublimed (>40°C) under vacuum before use.

## Instruments and Methods

<sup>1</sup>H NMR spectra were recorded on a JEOL LMX-GX 400 (400 MHz) spectrometer. Chemical shift was referenced to the residual solvent signal. Electrospray ionization mass (ESI-MS) spectra were obtained on a Perkin-Elmer Sciex API-300 mass spectrometer. Scanning was in 0.1-dalton steps and a 10-ms dwell time per step. The orifice voltage was controlled from -20 to +180 V, dependent on the intensity of TIC. High-resolution mass (HR-MS) spectra were recorded on a JEOL LMS-HX-110 spectrometer with 3-nitrobenzyl alcohol (NBA) as a matrix.

The UV-vis electronic spectra were recorded on a Hamamatsu PMA-11 CCD spectrophotometer with a Photal MC-2530 (D<sub>2</sub>/W<sub>2</sub>) as a light source. The temperature was controlled by a NESLAB ULT-95 low temperature circulator. To a degassed solution of model compound (~ 10<sup>-4</sup> M) in a 0.2-cm UV cuvette, dry O<sub>2</sub> gas through molecular sieves was introduced into the solution with O<sub>2</sub> line. Its spectral change was monitored by an UV-vis spectrometer. After formation of the heme-superoxide (**2a**, **2b**), excess O<sub>2</sub> was removed from the UV cuvette by evacuating the headspace and backfilling with N<sub>2</sub> (5×). A solution of CoCp<sub>2</sub> and Fe<sup>II</sup>- reduced form in THF (1.0 equiv.) was then added to the resultant solution of compound (**2a**, **2b**) at -70 °C and its UV-vis spectral change was recorded.

ESR spectra were obtained at 77 K in a 5.0-mm diameter ESR quartz tubes using a JEOL JES-TE 300 spectrometer. The magnetic field was calibrated using the signal of Mn(II) ion

doped in MgO powder ( $g = 2.034$  and  $1.981$ ). Experimental conditions: microwave frequency: 100 kHz, modulation amplitude: 10 G, and microwave power: 1.0 mW.

In a glove box, a solution of compound **1a** and **1b** ( $\sim 10^{-3}$  M) was transferred to an EPR tube. The tube was capped with a rubber septum, removed from the glove box and stored in a cold bath (liq. N<sub>2</sub>/ethanol) at  $-65$  °C. Oxygenation reaction was carried out by directly bubbling the chilled solution with dry O<sub>2</sub> introduced via a syringe. The oxygenated solution was allowed to keep at this temperature for 10 min, after which the solution was frozen in liquid N<sub>2</sub> and excess O<sub>2</sub> was removed by evacuation and backfilling with N<sub>2</sub>. The solution was then thawed in a cold bath (liq. N<sub>2</sub>/ethanol) at  $-70$  °C, and a solution of CoCp<sub>2</sub> and Fe<sup>II</sup>-reduced form in THF was introduced via a syringe. The resultant solution was mixed completely by shaking the tube, and then it was frozen in liquid N<sub>2</sub> prior to spectral recording.

RR spectra were obtained on a SpectraPro-300i spectrometer (Acton Research) with a 2400-groove grating, a holographic Supernotch filter (Kaiser Optical Systems), and LN-1100PB CCD detector (Princeton Instruments) cooled with liquid N<sub>2</sub>. Spectra were collected at an excitation wavelength  $\lambda_{\text{ex}} = 413.1$  nm with spinning frozen sample positioned in a backscattering geometry. The procedure for rR sample preparation was the same as that of ESR sample described above by using of quartz NMR tubes. The sample was kept in liquid N<sub>2</sub> in a double-walled low-temperature quartz dewer. Power at the sample was less than 5 mW. Peak frequencies were calibrated relative to toluene and CCl<sub>4</sub> standards (accurate to  $\pm 1$  cm<sup>-1</sup>). For each rR sample, ESR spectra were also taken before and after the rR measurement, respectively.

## Synthesis of the model compounds

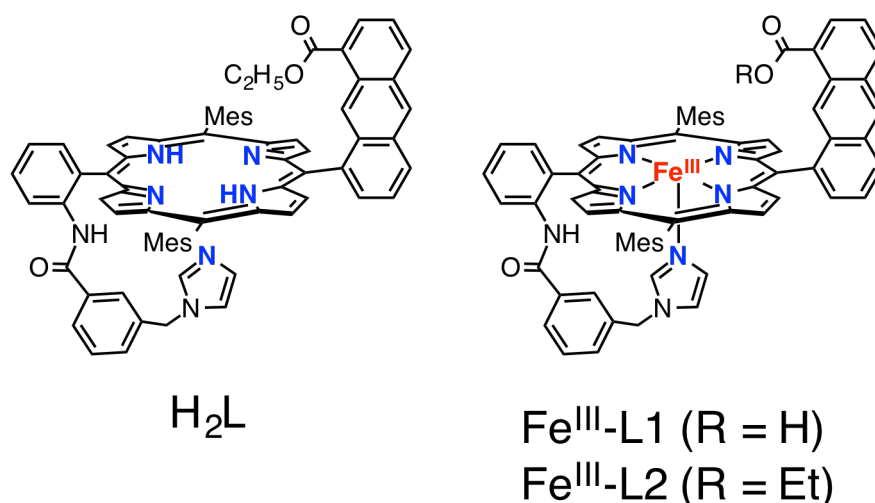

**Chart 1.** Synthesized porphyrins.

### 5-([3-Imidazole-1-yl]methyl)benzoylamido)phenyl)-15-[1-(2-ethoxycarbonylanthracene)]-10,20-dimesitylporphyrin ( $\text{H}_2\text{L}$ )

The synthesis of  $\text{H}_2\text{L}$  will be reported somewhere else.

**$^1\text{H}$  NMR** ( $\text{CDCl}_3$ , 400 MHz):  $\delta$  = 8.96 (s, 1H, Ar-H), 8.87 (d, 1H, Ar-H), 8.81 (d, 2H,  $\beta$ -H), 8.76 (s, 1H, Ar-H), 8.71 (d, 2H,  $\beta$ -H), 8.57 (dd, 4H,  $\beta$ -H), 8.45 (d, 1H, Ar-H), 8.25 (d, 1H, Ar-H), 8.2 (d, 1H, Ar-H), 8.18 (d, 1H, Ar-H), 8.14 (d, 1H, Ar-H), 7.9 (s, 1H, Ar-H), 7.89-7.85 (m, 2H, Ar-H), 7.71 (s, 1H, NH), 7.61 (t, 1H, Ar-H), 7.42 (s, 1H, Ar-H), 7.22 (s, 4H, Ar-H), 6.99 (s, 1H, Im-H), 6.8 (s, 1H, Im-H), 6.51 (s, 1H, Im-H), 6.50 (d, 1H, Ar-H), 6.25 (t, 1H, Ar-H), 6.01 (d, 1H, Ar-H), 5.91 (t, 1H, Ar-H), 4.28 (s, 2H,  $\text{CH}_2$ ), 2.8 (q, 2H,  $\text{OCH}_2\text{CH}_3$ ), 2.6 (s, 6H,  $\text{CH}_3$ ), 1.81 (s, 6H,  $\text{CH}_3$ ), 1.79 (s, 6H,  $\text{CH}_3$ ), -1.04 (t, 3H,  $\text{OCH}_2\text{CH}_3$ ), -2.37 (br, 2H, NH) ppm; **ESI-MS**:  $m/z$ : 1070.5  $[\text{M}+\text{H}]^+$ ; **HR-MS** (FAB, NBA): calcd. for  $\text{C}_{72}\text{H}_{59}\text{O}_3\text{N}_7$ : 1069.50; Found: 1070.48,  $[\text{M}+\text{H}]^+$ .

### 5-([3-Imidazole-1-yl]methyl)benzoylamido)phenyl)-15-[1-(2-ethoxycarbonylanthracene)]-10,20-dimesitylporphyrinatoiron(III)bromide ( $[\text{Fe}^{\text{III}}\text{L2}]\text{Br}$ )

To a solution of  $\text{H}_2\text{L}$  (50 mg, 42  $\mu\text{mol}$ ) in deoxygenated THF (30 mL) at reflux was added  $\text{FeBr}_2$  (36 mg, 168  $\mu\text{mol}$ ), and heating was continued for 3 h under  $\text{N}_2$  atmosphere. After cooling the solution to r.t. the solution was opened to air and chloroform (40 mL) was added. The organic phase was treated with 2.0 N HCl, and washed with water (3 x 50 mL), and saturated NaBr solution, respectively. The organic phase was dried over anhydrous  $\text{Na}_2\text{SO}_4$ .

Removing the solvent under vacuum, and the resultant residue was purified by flash column chromatography (silica gel, MeOH/CH<sub>2</sub>Cl<sub>2</sub>, v/v = 5:95). Yield: 46 mg, 88 %. ESI-MS: *m/z*: 1124.4 [M+H]<sup>+</sup>; HR-MS (FAB, NBA): calcd for C<sub>72</sub>H<sub>57</sub>FeN<sub>7</sub>O<sub>3</sub>: 1123.4; Found: 1123.39 [M-Br]<sup>+</sup>. UV/Vis (THF): λ<sub>max</sub> (ε) = 422 (8.8 × 10<sup>4</sup>), 512 (9.0 × 10<sup>3</sup> M<sup>-1</sup> cm<sup>-1</sup>).

**5-({[3-Imidazole-1-yl)methyl]benzoylamido}phenyl)-15-[1-(2-hydroxycarbonylanthracene)]-10,20-dimesitylporphyrinato-iron(III) bromide ([Fe<sup>III</sup>L1]Br)**

To a solution of ([Fe<sup>III</sup>L2]Br) in THF (6 mL) added 2N LiOH aq. (416 μL, 0.832 mmol), and MeOH (3 mL) was refluxed under nitrogen atmosphere for 5 h. The solvent was removed by a rotary evaporator. The solids were redissolved in CH<sub>2</sub>Cl<sub>2</sub> and washed with water. The organic layer was stirred with 3N HCl (1 mL), then washed with water. The organic phase was stirred with saturated NaBr solution for 20 min. The organic phase was dried over anhydrous Na<sub>2</sub>SO<sub>4</sub>. Removing the solvent under vacuum, and the resultant residue was purified by flash column chromatography (silica gel, MeOH/CH<sub>2</sub>Cl<sub>2</sub>, v/v = 2:98). Yield: 40 mg, 82%. ESI-MS: *m/z*: 1095.4 (100) [M-Br]<sup>+</sup>; HR-MS (FAB, NBA): calcd for C<sub>70</sub>H<sub>53</sub>FeN<sub>7</sub>O<sub>3</sub>: 1095.4; Found: 1095.36 [M-Br]<sup>+</sup>. UV/Vis (THF): λ<sub>max</sub> (ε) = 418 (7.8 × 10<sup>4</sup> M<sup>-1</sup> cm<sup>-1</sup>).

**Deuteration of [Fe<sup>III</sup>L1]Br for preparation of Fe-OOD intermediate**

In a glove-box, compound Fe<sup>III</sup>-L1 (0.9 μmol) dissolved in 0.4 mL THF and 0.2 mL DCM mixture. To this solution added 1 mL D<sub>2</sub>O, then stirred over night. Remove the solvent under vacuum, then add 2 mL DCM and separate aqueous layer. The organic layer was dried over anhydrous Na<sub>2</sub>SO<sub>4</sub>. Remove the solvent under vacuum and dry for 4h.

**[Fe<sup>II</sup>L1] (1a) and [Fe<sup>II</sup>L2] (1b)** Added 1 equiv. of cobaltocene in THF solution to the ([Fe<sup>III</sup>L1]Br) and ([Fe<sup>III</sup>L2]Br) in 80% EtCN/CH<sub>2</sub>Cl<sub>2</sub> in a glove box.

**[Fe<sup>II</sup>L1] (1a)** UV/vis : λ<sub>max</sub> (ε) = 428 (9 × 10<sup>4</sup>), 535 (1.9 × 10<sup>4</sup>), 570 (7 × 10<sup>3</sup> M<sup>-1</sup>cm<sup>-1</sup>); ESI-MS: *m/z*: 1095.4

**[Fe<sup>II</sup>L2] (1b)** UV/vis : λ<sub>max</sub> (ε) = 428 (9.3 × 10<sup>4</sup>), 535 (2 × 10<sup>4</sup>), 570 (8.5 × 10<sup>3</sup> M<sup>-1</sup>cm<sup>-1</sup>); ESI-MS: *m/z*: 1123.4

## Spectroscopic characterization of reaction intermediates

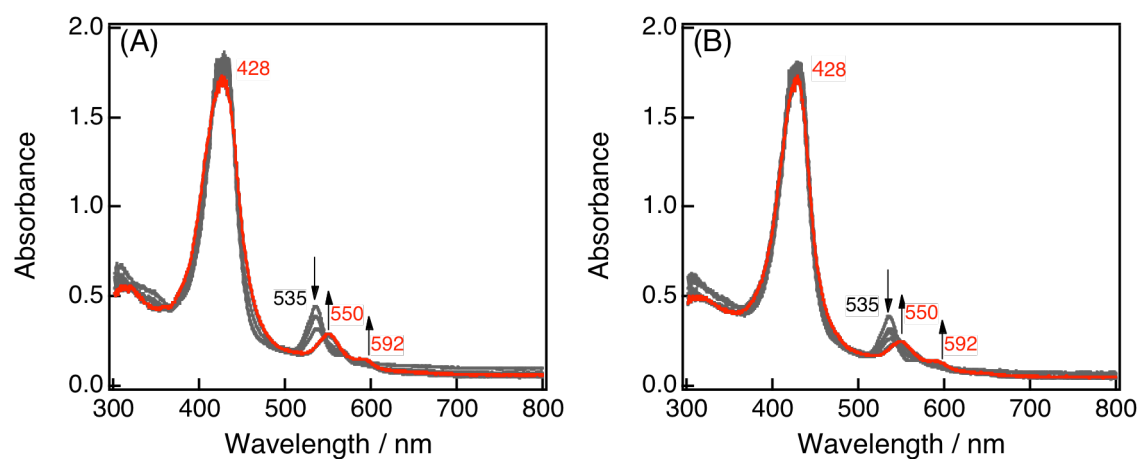

**Figure S1.** (A) UV-visible spectral changes of compound **1a** upon oxygenation to afford **2a** and (B) UV-visible spectral changes of compound **1b** upon oxygenation to afford **2b** in 80 % EtCN/CH<sub>2</sub>Cl<sub>2</sub> at -65 °C. Spectral interval 1 min.

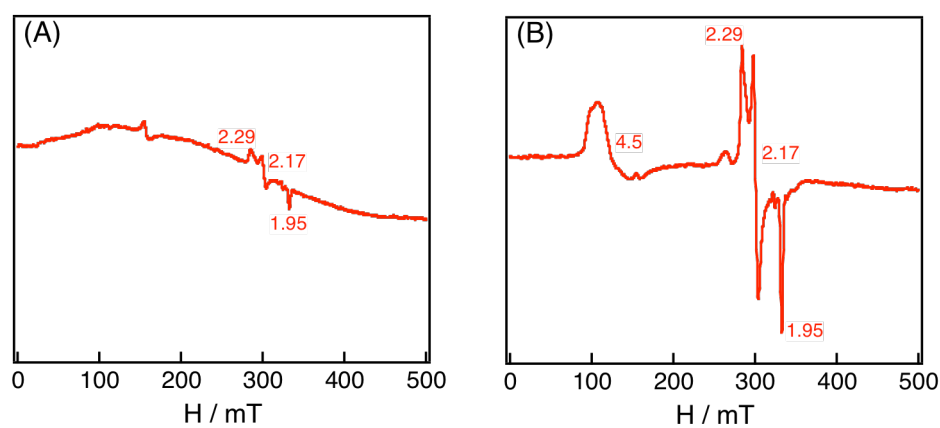

**Figure S2.** ESR spectra of (A) unexpected generation of compound **3a** upon oxygenation of compound **1a** in 80% EtCN/CH<sub>2</sub>Cl<sub>2</sub> at -65 °C. (B) compound **4** and **3a** 1:1 generated by the addition of 1 equiv of compound **1a** to the solution of **2a** in 80% EtCN/CH<sub>2</sub>Cl<sub>2</sub> at -70 °C.

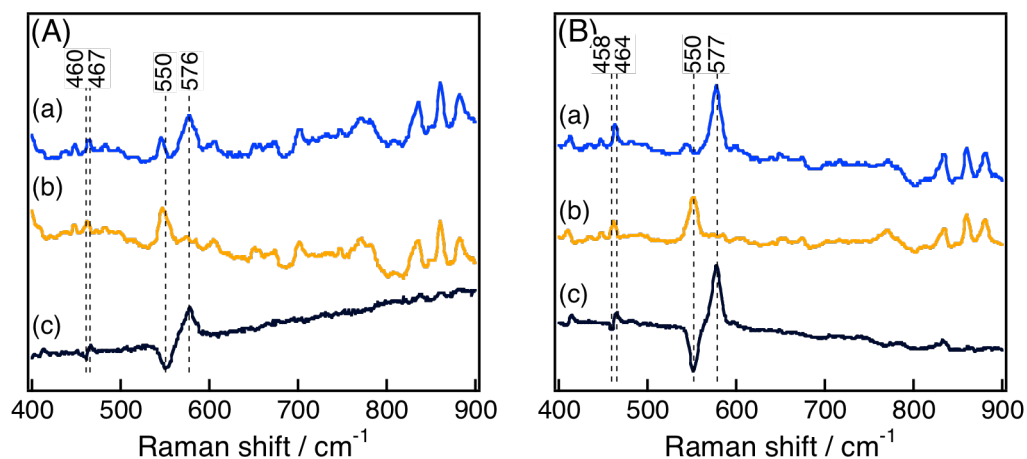

**Figure S3.** (A) rR spectra ( $\lambda_{\text{ex}}=413$  nm, 77 K) of **2a** containing (a)  $^{16}\text{O}$  and (b)  $^{18}\text{O}$  and (c) their difference spectrum (a-b). (B) rR spectra ( $\lambda_{\text{ex}}=413$  nm, 77 K) of **2b** containing (a)  $^{16}\text{O}$  and (b)  $^{18}\text{O}$  and (c) their difference spectrum (a-b).

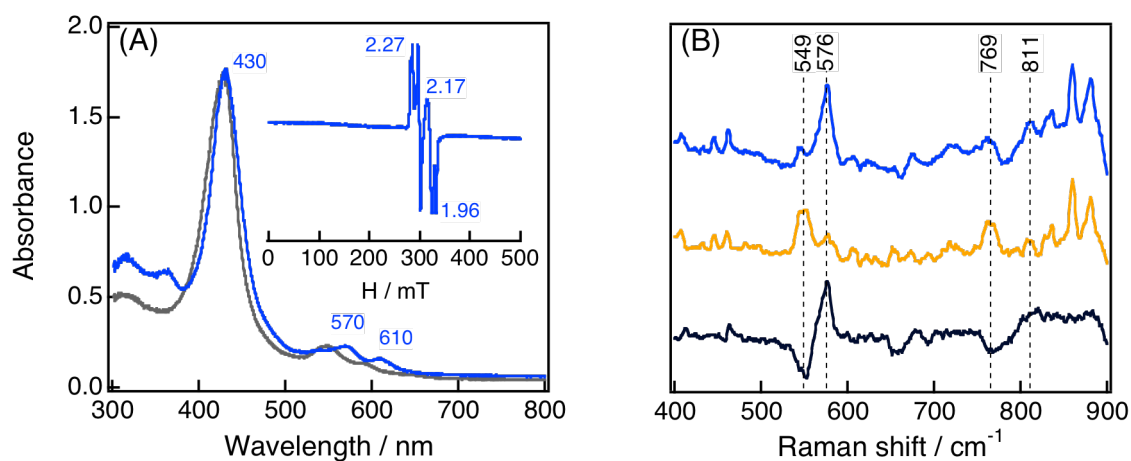

**Figure S4.** (A) UV-vis spectra of **3b** (red line) generated by addition of  $\text{CoCp}_2$  and methanol to the solution of **2b** in 80% EtCN/ $\text{CH}_2\text{Cl}_2$  at  $-70$  °C. Inset: ESR spectrum of **3b** at 77 K. (B) rR spectra of **3b** generated by addition of  $\text{CoCp}_2/\text{MeOH}$  (300 equiv.) to the solution of **2b** in 80% EtCN/ $\text{CH}_2\text{Cl}_2$  at  $-70$  °C containing (a)  $^{16}\text{O}$  and (b)  $^{18}\text{O}$  and (c) difference spectrum of (a)-(b).  $\lambda_{\text{ex}} = 413$  nm, 77 K.

## Computational details

DFT computations were carried out using Jaguar version 7.7 program package.<sup>1</sup> Fully optimized molecular structures were obtained by geometry optimization at the BP86/LACV3P+\* (Fe) and 6-311+G\* (N and O (O<sub>2</sub>)) and 6-31G\* (other atoms) level, and calculation of Hessians at the same theory level were performed. Solvation energy calculations were carried out by using the Poisson-Boltzmann solver with propanonitrile (dielectric constant of 29.324 and probe radius of 2.41)<sup>2</sup> as a solvent on the optimized structures using the same theory level.

The geometry optimization of the acid complex was carried out using a model in which the carboxylic acid group donates a H-bond to heme-bound O<sub>2</sub> or O<sub>2</sub>H ligands. The ester complex was modeled using a methoxy group, and conformational variants were taken into consideration as shown in Scheme 1: The methoxy group is pointed to the heme bound O<sub>2</sub> ligand in A mechanism, while the relative position of the methoxy and carbonyl is flipped in B mechanism. Comparison of the reaction mechanisms using these models should illuminate the role of the H-bond interaction in the O<sub>2</sub> activation.

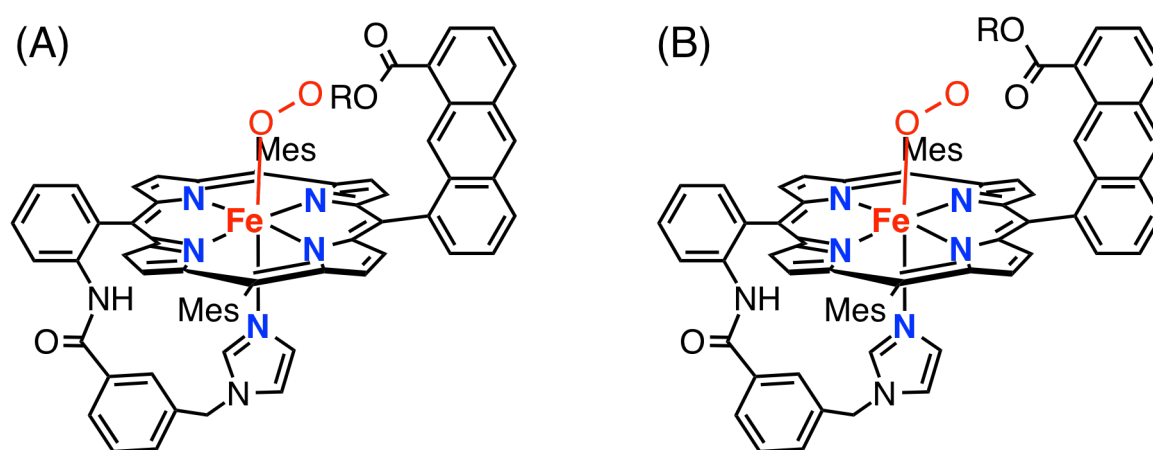

**Scheme S1.** Possible conformations of the ester complex A and B, where R represents CH<sub>3</sub>.



A water molecule was included in the computational models of the acid and ester complexes, because a low concentration (a few ppm level) of water could remain in solvents even though it was dried carefully.<sup>3</sup> The complex **2** (ferric-superoxy species) and its protonated form was calculated in a broken symmetry method, in which  $\alpha$  and  $\beta$  electron densities are allowed to localize on different atoms. The spin-projected correction developed by Yamaguchi<sup>4</sup> was carried out using equations 1 and 2 to take into consideration of relatively large spin contaminations of the broken-symmetry calculations.

$$E_s = (E_c - aE_{s+1}) / (1 - a) \quad (\text{eq. 1})$$

$$a = \left[ \left\langle S^2 \right\rangle_c - s(s+1) \right] / 2(s+1) \quad (\text{eq. 2})$$

$E_c$  is the spin-contaminated energy for singlet state,  $E_{s+1}$  is the energy for the triplet state,  $\langle S^2 \rangle_c$  is the calculated spin expectation value of the spin-contaminated singlet state.<sup>5</sup>

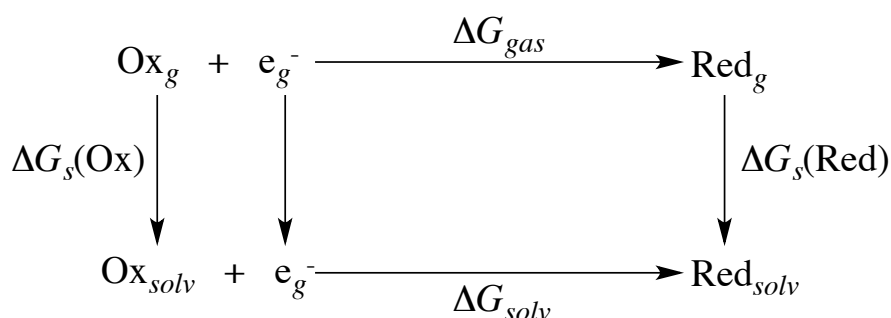

**Scheme S2.** Calculation of free energy changes of reduction under solvated conditions using a Born-Haber cycle.

The calculation of redox potential of molecules relies on free energy change between the reactant and one-electron oxidized or reduced species under solvated conditions. The frequently used procedure to calculate free energy change under solvation assumes Born-Haber cycle (Scheme S2), in which gas phase free energy change in redox reaction is first calculated and then the gas-phase energy is calibrated by the difference of solvation energy between the reactant and product as shown in equations 3 and 4.

$$\Delta G_{solv} = \Delta G_{gas} + \Delta G_s(Red) - \Delta G_s(Ox) \quad (\text{eq. 3})$$

$$\Delta G_{gas} = \Delta H_{gas} - T\Delta S_{gas} \quad (\text{eq. 4})$$

$$\Delta G_{solv} = -nFE^\circ \quad (\text{eq. 5})$$

In Scheme S2,  $Ox_g$  corresponds to the gas phase geometry optimized structure of ferric-superoxy heme, and  $Red_g$  is one-electron reduced species of  $Ox_g$  in the gas phase. The Nernst equation determines the standard one-electron redox potentials,  $E^\circ/V$ , as shown in equation 5, where  $F$  is the Faraday constant  $23.06 \text{ kcal mol}^{-1} \text{ V}^{-1}$ . Calculations were carried out for gas-phase geometries employing dielectric constant of 29.324 (propanonitrile) for the solvating continuum medium. To correlate the computationally obtained redox potential with experimental data, referencing the calculated value with the standard hydrogen electrode potential in the organic solvent is necessary, for which 4.53 eV was used.<sup>6,7</sup>

Calculation of  $pK_a$  is based on the equations 6-8. In equation 7,  $T$  corresponds to 228.5 K and  $k_B$  is the Boltzmann constant. The calculation of  $pK_a$  of molecules relies on free energy change between the reactant and protonated species under solvated conditions. The frequently used procedure to calculate free energy change under solvation assumes Born-Haber cycle (Scheme S3), in which gas phase free energy change in protonation is first calculated and then the gas-phase energy is calibrated by the difference of solvation energy between the reactant and product as shown in equation 8.

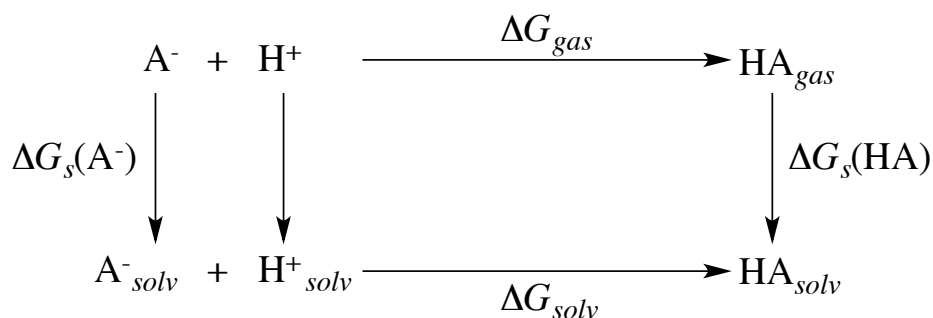

**Scheme S3.** Calculation of free energy changes of protonation under solvated conditions using a Born-Haber cycle.

$$\Delta G_{solv} = \beta p K_a \quad (\text{eq. 6})$$

$$\beta = k_B T \quad (\text{eq. 7})$$

$$\Delta G_{solv} = \Delta G_{gas} + \Delta G_s(A^-) + \Delta G_s(H^+) - \Delta G_s(HA) \quad (\text{eq. 8})$$

$\Delta G_{gas}$  ( $= \Delta H_{gas} - T\Delta S_{gas}$ ) is the free energy change due to the protonation in the gas phase. The solvation free energy of proton in the solvent was assumed as -257.2 kcal/mol to have consistency with the absolute potential of SHE in the organic solvent.<sup>6,7</sup>

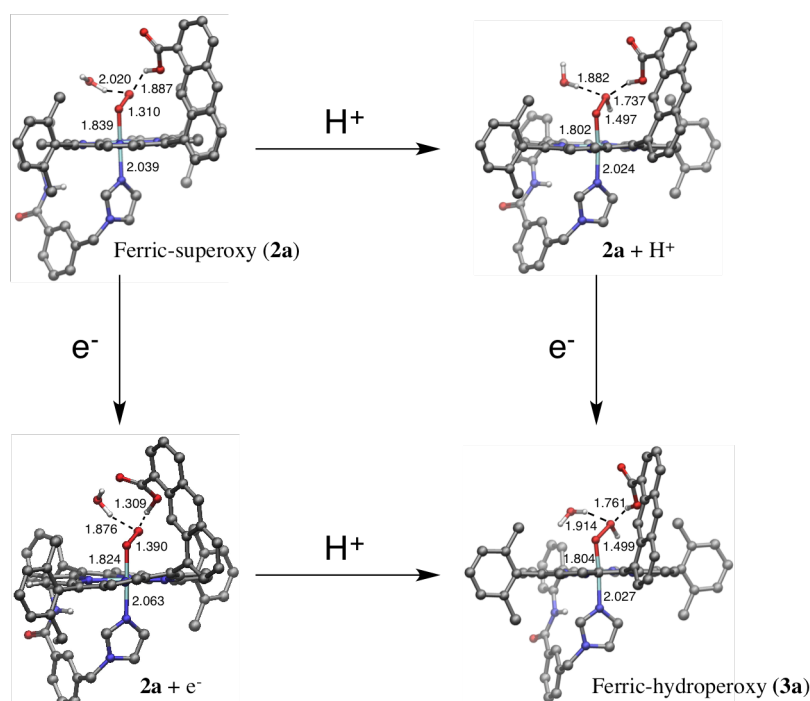

**Figure S5.** DFT optimized geometries of reaction intermediates involved in one-electron reduction and protonation of ferric-superoxy species of the acid complex.

**Table S1.** BP86 DFT calculated energies of the acid complex.<sup>a</sup>

|                            | SCFE              | $G_{\text{gas}}^b$ | $\Delta G_{\text{sol}}$ |
|----------------------------|-------------------|--------------------|-------------------------|
| <b>2a</b>                  | -3580.26894485959 | -3579.329757       | -27.6379                |
| <b>2a + 1e<sup>-</sup></b> | -3580.36458933471 | -3579.429474       | -55.6211                |
| <b>2a + H<sup>+</sup></b>  | -3580.67045140951 | -3579.719124       | -47.9663                |
| <b>4a</b>                  | -3580.88881371644 | -3579.937511       | -28.333                 |

<sup>a</sup> Units are in hartree except the solvation energy  $\Delta G_{\text{sol}}$  in kcal/mol. <sup>b</sup>  $G_{\text{gas}} = H_{\text{tot}} - T \cdot S$ , where in  $H_{\text{tot}} = U_{\text{tot}} + pV$  and  $U_{\text{tot}} = \text{SCFE} + \text{ZPE} + U$ .

**Table S2.** DFT calculated energies for spin projected correction of **2a**.

| State                                  | <b>2a</b>         | <b>2a + H<sup>+</sup></b> |
|----------------------------------------|-------------------|---------------------------|
| Singlet (BS)                           | -3580.26894485959 | -3580.67045140951         |
| $\langle S^2 \rangle_{\text{singlet}}$ | 0.667             | 1.017                     |
| Singlet (Corrected)                    | -3580.271763      | -3580.674854              |
| Triplet                                | -3580.26331285092 | -3580.66622159187         |
| $\langle S^2 \rangle_{\text{triplet}}$ | 2.023             | 2.018                     |

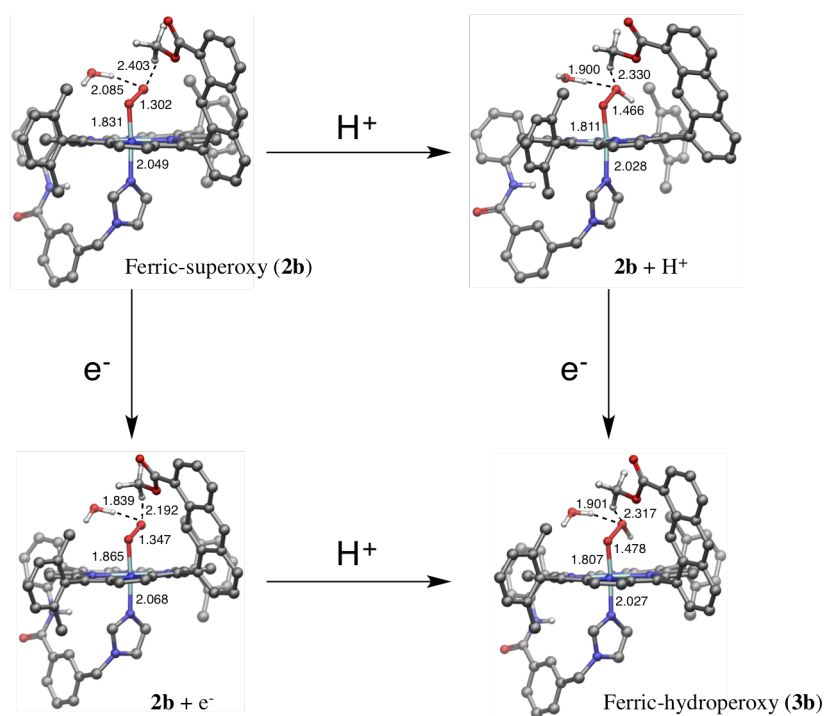

**Figure S6.** DFT optimized geometries of reaction intermediates involved in one-electron reduction and protonation of ferric-superoxy species of the ester complex (A-mechanism).

**Table S3.** BP86 DFT calculated energies of the ester complex in the A mechanism.<sup>a</sup>

|                           | SCFE              | $G_{\text{gas}}^b$ | $\Delta G_{\text{sol}}$ |
|---------------------------|-------------------|--------------------|-------------------------|
| <b>2b</b>                 | -3619.56610562442 | -3618.600182       | -26.5536                |
| <b>2b</b> + $1\text{e}^-$ | -3619.65136120448 | -3618.688087       | -52.5356                |
| <b>2b</b> + $\text{H}^+$  | -3619.96601426557 | -3618.991466       | -48.4305                |
| <b>3b</b>                 | -3620.18431483667 | -3619.208122       | -27.3818                |

<sup>a</sup> Units are in hartree except the solvation energy  $\Delta G_{\text{sol}}$  in kcal/mol. <sup>b</sup>  $G_{\text{gas}} = H_{\text{tot}} - T \cdot S$ , wherein  $H_{\text{tot}} = U_{\text{tot}} + pV$  and  $U_{\text{tot}} = \text{SCFE} + \text{ZPE} + U$ .

**Table S4.** DFT calculated energies for spin projected correction of **2b** in the path A.

| State                                  | <b>2b</b>         | <b>2b</b> + $\text{H}^+$ |
|----------------------------------------|-------------------|--------------------------|
| Singlet (BS)                           | -3619.56610562442 | -3619.96601426557        |
| $\langle S^2 \rangle_{\text{singlet}}$ | 0.641             | 0.962                    |
| Singlet (Corrected)                    | -3619.569398      | -3619.966373             |
| Triplet                                | -3619.55912619536 | -3619.96562761973        |
| $\langle S^2 \rangle_{\text{triplet}}$ | 2.025             | 2.021                    |

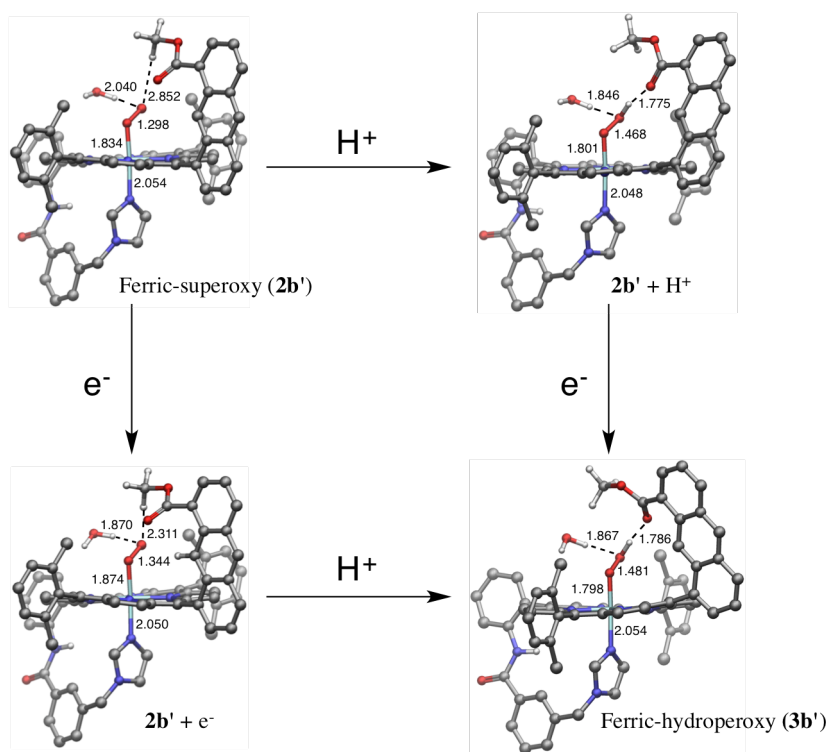

**Figure S7.** DFT optimized geometries of reaction intermediates involved in one-electron reduction and protonation of ferric-superoxy species of the ester complex (B mechanism).

**Table S5.** BP86 DFT calculated energies of ester model in the B mechanism.<sup>a</sup>

|                                | SCFE              | $G_{\text{gas}}^b$ | $\Delta G_{\text{sol}}$ |
|--------------------------------|-------------------|--------------------|-------------------------|
| <b><math>2b'</math></b>        | -3619.56547680567 | -3618.602820       | -25.0355                |
| <b><math>2b' + 1e^-</math></b> | -3619.64676951113 | -3618.684547       | -51.9046                |
| <b><math>2b' + H^+</math></b>  | -3619.98089425841 | -3619.005105       | -44.9999                |
| <b><math>3b'</math></b>        | -3620.19281890382 | -3619.214321       | -24.8017                |

<sup>a</sup> Units are in hartree except the solvation energy  $\Delta G_{\text{sol}}$  in kcal/mol. <sup>b</sup>  $G_{\text{gas}} = H_{\text{tot}} - T \cdot S$ , wherein  $H_{\text{tot}} = U_{\text{tot}} + pV$  and  $U_{\text{tot}} = \text{SCFE} + \text{ZPE} + U$ .

**Table S6.** DFT calculated energies for spin projected correction of  $2b'$  in the path B.

| State                                  | <b><math>2b'</math></b> | <b><math>2b' + H^+</math></b> |
|----------------------------------------|-------------------------|-------------------------------|
| Singlet (BS)                           | -3619.56547680567       | -3619.98089425841             |
| $\langle S^2 \rangle_{\text{singlet}}$ | 0.664                   | 1.021                         |
| Singlet (Corrected)                    | -3619.573697            | -3619.980956                  |
| Triplet                                | -3619.54835023457       | -3619.98085741373             |
| $\langle S^2 \rangle_{\text{triplet}}$ | 2.032                   | 2.022                         |

## Reference

- [1] A. D. Bochevarov, E. Harder, T. F. Hughes, J. R. Greenwood, D. A. Braden, D. M. Philipp, D. Rinaldo, M. D. Halls, J. Zhang and R. A. Friesner, *Int. J. Quantum Chem.*, 2013, **113**, 2110.
- [2] J. D. Thompson, C. J. Cramer and D. G. Truhlar, *J. Chem. Phys.*, 2003, **119**, 1661.
- [3] D. B. G. Williams and M Lawton, *J. Org. Chem.*, 2010, **75**, 8351.
- [4] K. Yamaguchi, F. Jensen, A. Dorigo, K. Houk, *Chem. Phys. Lett.* 1988, **149**, 537.
- [5] H. Chen, M. Ikeda-Saito and S. Shaik, *J. Am. Chem. Soc.*, 2008, **130**, 14778-14790.
- [6] S. Trasatti, *Pure. Appl. Chem.*, 1986, **58**, 955-966.
- [7] A. A. Isse and A. Gennaro *J. Phys. Chem. B*, 2010, **114**, 7894–7899.
